# Supplementary material
Source: MDPI journal article supplement (https://www.mdpi.com/2071-1050/14/18/11404)
Supplement: s1 [file s1 › sustainability-1902034-supplementary.pdf]

- The influence of technological parameters in the process of lattice structure design is described, and the method design to better improve mechanical properties is proposed.
- The development of density design optimization and variable density lattice design in topology optimization is studied.
- It innovatively analyzed the method of connecting three period minimal surface elements and the advantages and research potential of combining topology optimization.
